# Supplementary material for: Differential response to exercise in claudin-low breast cancer
Source: PubMed Central journal article supplement (PMC5731850; doi:10.18632/oncotarget.21054), 2017-09-19
Supplement: oncotarget-08-100989-s001.pdf [file oncotarget-08-100989-s001.pdf]

## Differential response to exercise in claudin-low breast cancer

### SUPPLEMENTARY MATERIALS

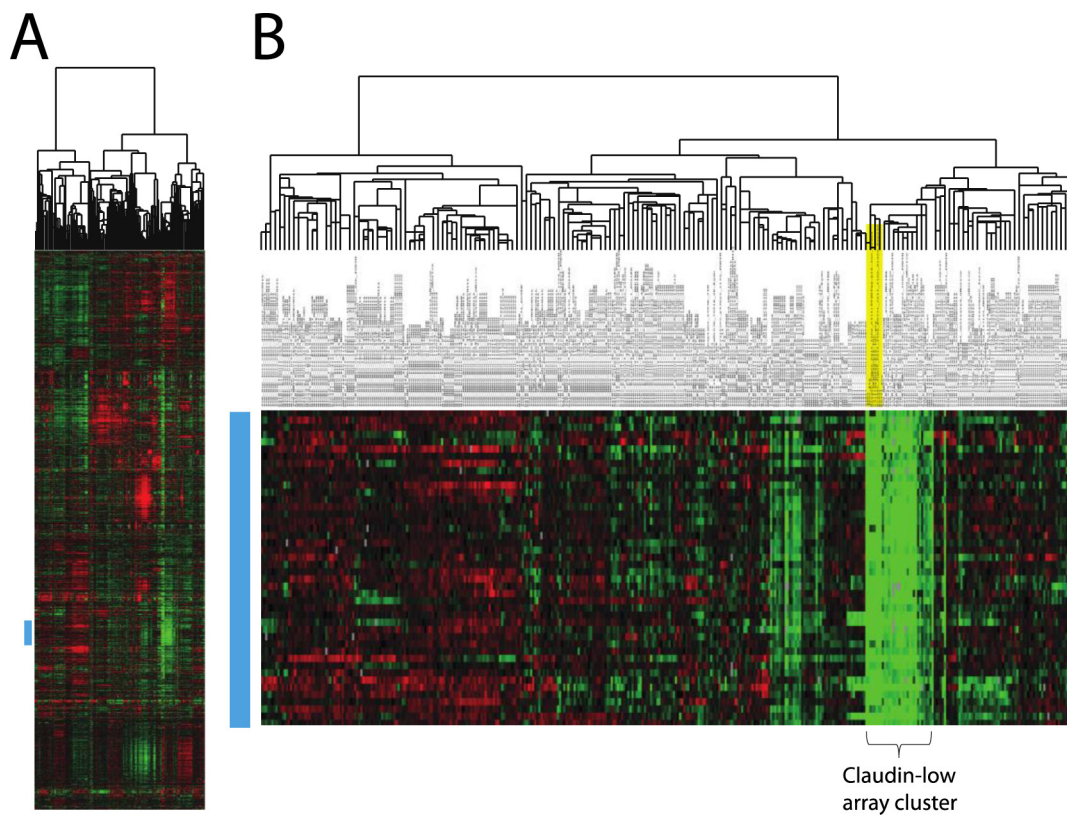

**Supplementary Figure 1: Microarray of C3(1)SV40Tag-p16-luc, EO771, and 4TO7 cell lines.** A. 1,855 intrinsic genes were used to hierarchical cluster 393 Agilent microarrays. The subset of the cluster with the claudin-low genes is highlighted with a blue bar on the left. B. A close-up of the claudin-low gene section shows the claudin-low array sub-cluster that includes 4TO7, C3(1)SV40Tag-p16-luc, and EO771 cell-line arrays highlighted in gold.

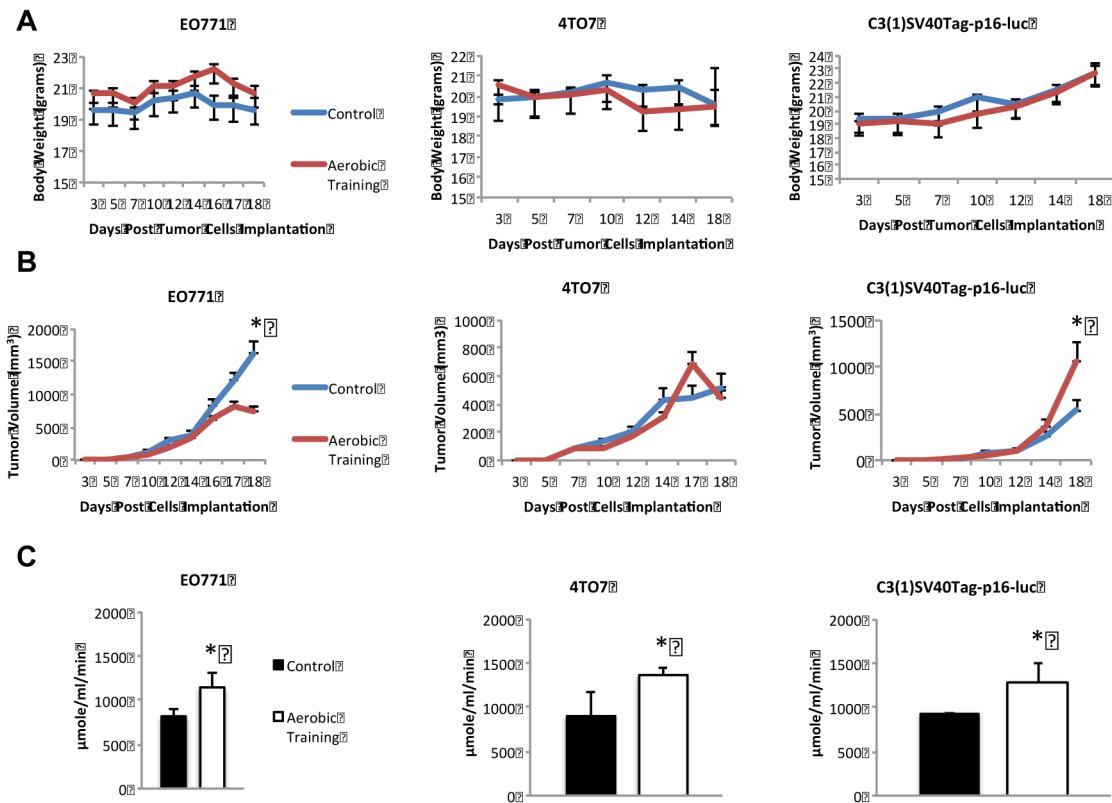

**Supplementary Figure 2: Aerobic training effects on bodyweight measurements, absolute tumor volumes, and intramuscular citrate synthase activity in mouse models of claudin-low breast cancer.** A. Mouse bodyweight over time. (Left) EO771; (Middle) 4TO7; (Right) C3(1)SV40Tag-p16-luc. Values are presented as mean  $\pm$  S.E.M. (n=10-12/group). B. Mean tumor volumes over time. (Left) EO771; (Middle) 4TO7; (Right) C3(1)SV40Tag-p16-luc. Values are presented as mean  $\pm$  S.E.M. (n=10-12/group); \*p<0.05. C. Citrate synthase activity in mouse quadriceps femoris following aerobic training or control treatment. (Left) EO771, p=0.03; (Middle) 4TO7, p=0.04; (Right) C3(1)SV40Tag-p16-luc, p=0.03. Values are presented as mean  $\pm$  S.E.M. (n=6/group); \*p<0.05.

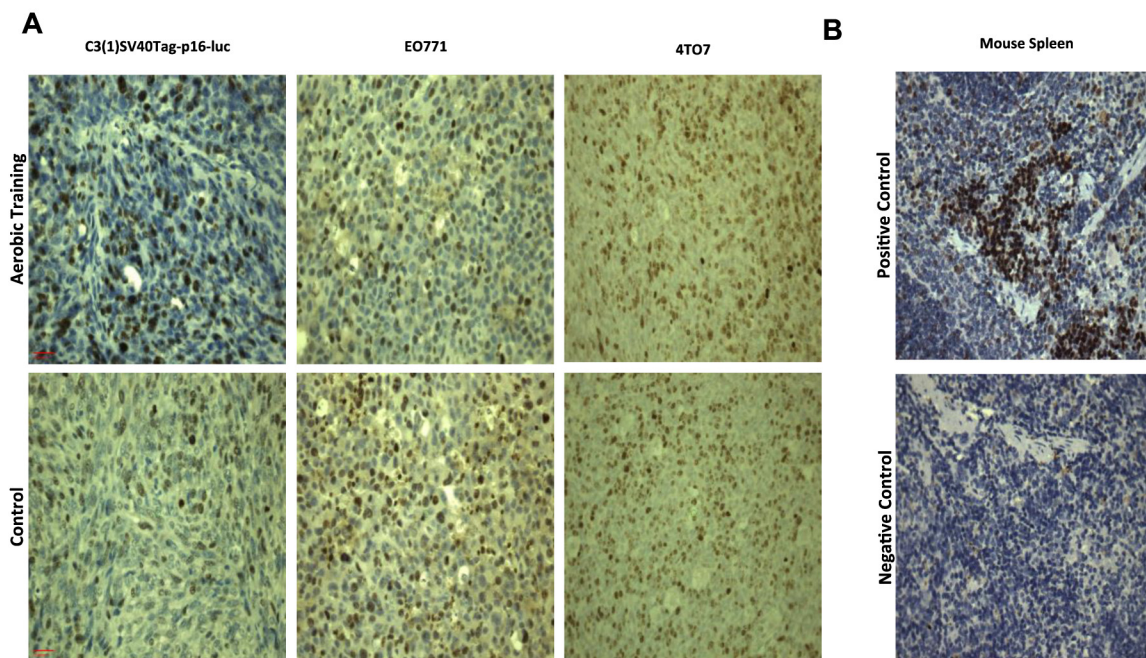

**Supplementary Figure 3: Ki-67 stained tumor sections from C3(1)SV40Tag-p16-luc and EO771 mouse tumors.** A. (Top left) Typical C3(1)SV40Tag-p16-luc tumor section from aerobic training group tumor counterstained with hematoxylin; (Top middle) typical EO771 tumor section from aerobic training group tumor counterstained with hematoxylin; (Top right) typical 4T07 tumor section from aerobic training group tumor counterstained with hematoxylin; (Bottom left) typical C3(1)SV40Tag-p16-luc tumor section from control group tumor counterstained with hematoxylin; (Bottom middle) typical EO771 tumor section from control group tumor counterstained with hematoxylin; (Bottom right) typical 4T07 tumor section from control group tumor counterstained with hematoxylin. B. Controls for Ki-67 staining. (Top) Mouse spleen section as positive control; (Bottom) no primary antibody negative control.

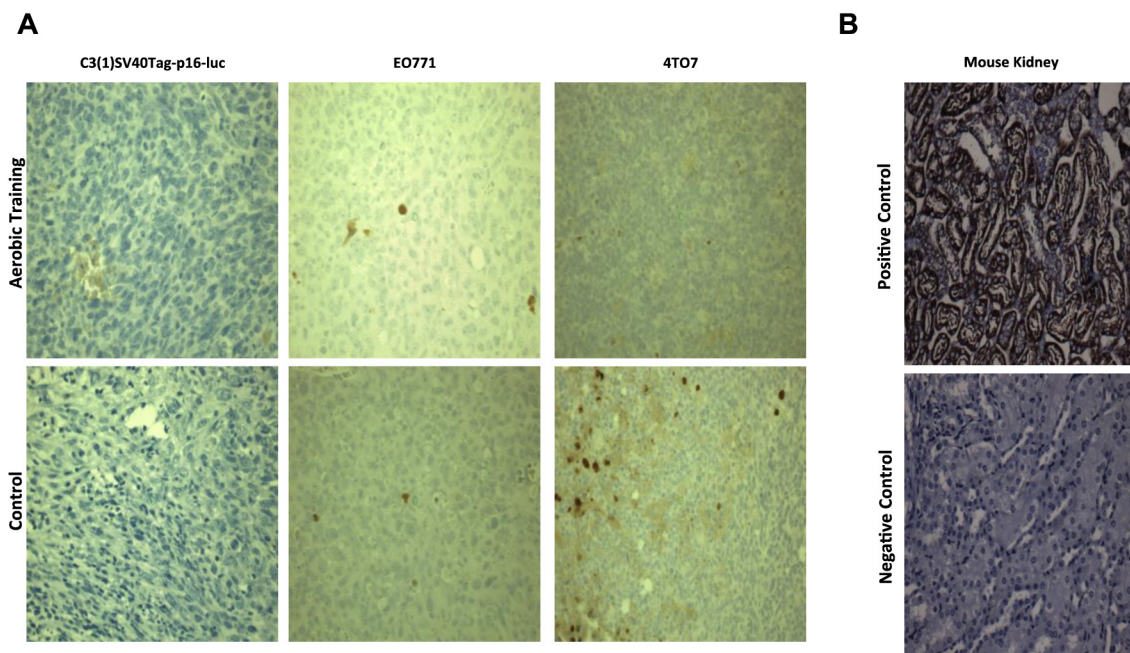

**Supplementary Figure 4: TUNEL staining of tumor sections from C3(1)SV40Tag-p16-luc and EO771 mouse breast tumors.** A. (Top left) Typical C3(1)SV40Tag-p16-luc tumor section from aerobic training group tumor counterstained with hematoxylin; (Top middle) typical EO771 tumor section from aerobic training group tumor counterstained with hematoxylin; (Top right) typical 4T07 tumor section from aerobic training group tumor counterstained with hematoxylin; (Bottom left) typical C3(1)SV40Tag-p16-luc tumor section from control group tumor counterstained with hematoxylin; (Bottom middle) typical EO771 tumor section from control group tumor counterstained with hematoxylin; (Bottom right) typical 4T07 tumor section from control group tumor counterstained with hematoxylin. B. Controls for TUNEL staining. (Top) Mouse kidney positive control; (Bottom) no primary antibody negative control for nonspecific staining.



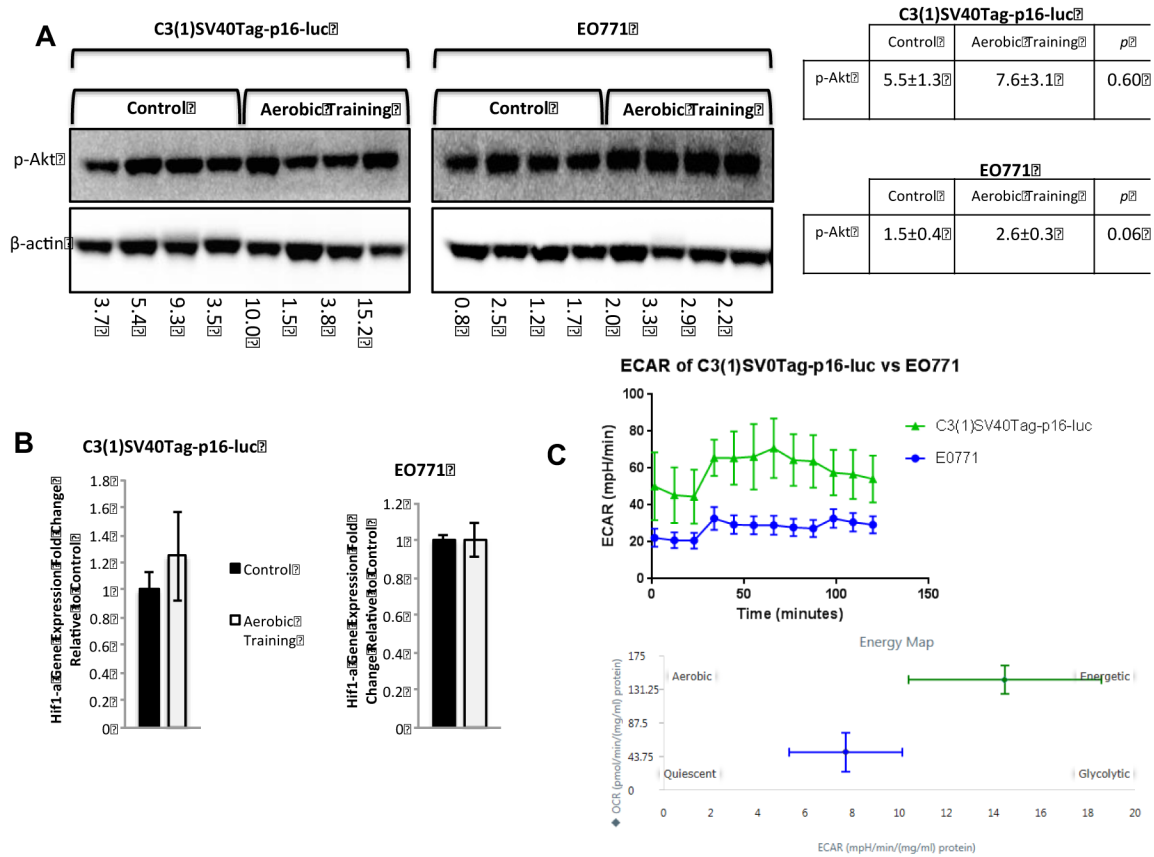

**Supplementary Figure 5: Phospho-Akt western blot and Hif1- $\alpha$  gene expression in C3(1)SV40Tag-p16-luc and EO771 mouse breast tumors; Seahorse extracellular acidification rate and bioenergetics profile in C3(1)SV40Tag-p16-luc and EO771 cell lines.** **A.** Western blots of phospho-Akt in mouse tumors: Phospho-Akt western blot in C3(1)SV40Tag-p16-luc tumors (Top Left), EO771 tumors (Top Right); C3(1)SV40Tag-p16-luc mouse tumors: Mean densitometry normalized to  $\beta$ -actin: Aerobic training, 7.6; control, 5.5; ( $p=0.60$ ); EO771 mouse tumors: Mean densitometry normalized to  $\beta$ -actin: Aerobic training, 2.6; control, 0.3; ( $p=0.06$ ). Values are presented in the chart mean  $\pm$  S.E.M. **B.** Hif1- $\alpha$  gene expression in mouse tumors. Hif1- $\alpha$  gene expression relative to control. Values indicate fold change and are mean  $\pm$  S.E.M.; ( $n=6$ /group). **C.** Seahorse extracellular acidification rate and bioenergetics profile in cell lines. (Top) Extracellular acidification rate (ECAR) over time for C3(1)SV40Tag-p16-luc and EO771 cell lines ( $p=0.04$ ). Values are mean  $\pm$  S.E.M.; ( $n=5$ /cell lines);  $*p<0.05$ . (Bottom) Bioenergetic map of C3(1)SV40Tag-p16-luc and EO771 cell lines presented as oxygen consumption rate (OCR) vs. ECAR.

**A**

| HMDB ID   | p.value  | Name                    |
|-----------|----------|-------------------------|
| HMDB00126 | 0.010724 | Glycerol 3-phosphate    |
| HMDB01254 | 0.019055 | Glucosamine 6-phosphate |
| HMDB00012 | 0.022156 | Deoxyuridine            |
| HMDB00259 | 0.02374  | Serotonin               |
| HMDB00943 | 0.026423 | Threonic acid           |
| HMDB00965 | 0.046176 | Hypotaurine             |
| HMDB06464 | 0.046735 | Elaidic carnitine       |
| HMDB00653 | 0.049994 | Cholesterol sulfate     |

**B**

| HMDB ID   | p.value   | Name                                                     |
|-----------|-----------|----------------------------------------------------------|
| HMDB06464 | 0.00357   | elaidic carnitine                                        |
| HMDB00222 | 0.0053223 | L-Palmitoylcarnitine                                     |
| HMDB00094 | 0.0080393 | Citric acid                                              |
| HMDB00624 | 0.008836  | D-Leucic acid                                            |
| HMDB04077 | 0.011031  | 4,6-Dihydroxyquinoline                                   |
| HMDB06317 | 0.017079  | trans-Hexadec-2-enoyl carnitine                          |
| HMDB00791 | 0.017654  | L-Octanoylcarnitine                                      |
| HMDB03873 | 0.01892   | 3a,7a,12a-Trihydroxy-5b-cholestanoic acid                |
| HMDB00754 | 0.019282  | 3-Hydroxyisovaleric acid                                 |
| HMDB01201 | 0.020997  | Guanosine diphosphate                                    |
| HMDB00072 | 0.022145  | cis-Aconitic acid                                        |
| HMDB00092 | 0.022781  | Dimethylglycine                                          |
| HMDB05066 | 0.024133  | Tetradecanoylcarnitine                                   |
| HMDB04096 | 0.025156  | 5-Methoxyindoleacetate                                   |
| HMDB00062 | 0.026579  | L-Carnitine                                              |
| HMDB00250 | 0.028559  | Pyrophosphate                                            |
| HMDB06009 | 0.029625  | Isoputrescine                                            |
| HMDB00295 | 0.036899  | Uridine 5'-diphosphate                                   |
| HMDB03357 | 0.039887  | N-Acetylcarnitine                                        |
| HMDB00848 | 0.040365  | Stearoylcarnitine                                        |
| HMDB02250 | 0.040572  | Dodecanoylcarnitine                                      |
| HMDB06210 | 0.04126   | Heptadecanoyl carnitine                                  |
| HMDB60065 | 0.042182  | N-methyl-4,6,7-trihydroxy-1,2,3,4-tetrahydroisoquinoline |
| HMDB01138 | 0.048465  | N-Acetylglutamic acid                                    |

**Supplementary Figure 6: Statistically significant metabolites altered in C3(1)SV40Tag-p16-luc and EO771 mouse breast tumors.** A. All metabolites with  $p < 0.05$  in C3(1)SV40Tag-p16-luc mouse breast tumors according to HMDB ID. B. All metabolites with  $p < 0.05$  in EO771 mouse breast tumors according to HMDB ID.

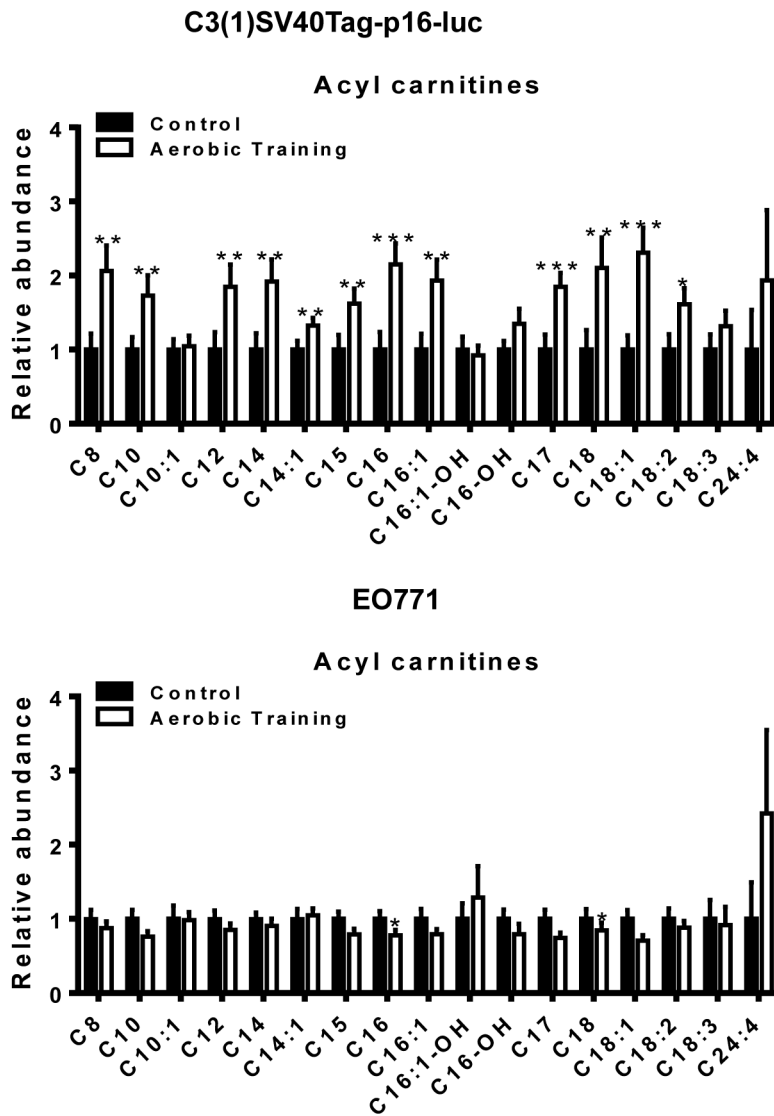

**Supplementary Figure 7: Acyl carnitine metabolites in C3(1)SV40Tag-p16-luc and EO771 mouse breast tumors.** (Top) C3(1)SV40Tag-p16-luc mouse tumors. The abundance of each metabolite is normalized to that in control group; mean + SEM. (Bottom) EO771 mouse tumors. The abundance of each metabolite is normalized to that in control group; mean + SEM.

## Supplementary Table 1: Analysis of effect of exercise on tumor growth rates

Table 1A: Estimated effects for E0771 model

| Term                          | Effect | Std.Error | t-value | p-value |
|-------------------------------|--------|-----------|---------|---------|
| Baseline ( $\mu$ )            | 1.74   | 0.44      | 3.94    |         |
| Initial effect ( $\alpha_j$ ) | -0.28  | 0.49      | -0.57   | 0.57    |
| Control rate ( $\beta$ )      | 0.31   | 0.03      | 10.48   | <0.0001 |
| Exercise effect ( $\beta_j$ ) | -0.01  | 0.03      | -0.21   | 0.83    |

For the E0771 model, the growth rate in the control group was 31%/day (Table 1A), but there was no significant effect of exercise on the growth rate (p-value = 0.83).

Table 1B: Estimated effects for 4T07 model

| Term                          | Effect | Std.Error | t-value | p-value |
|-------------------------------|--------|-----------|---------|---------|
| Baseline ( $\mu$ )            | 3.27   | 0.39      | 8.46    |         |
| Initial effect ( $\alpha_j$ ) | -0.38  | 0.50      | -0.77   | 0.44    |
| Control rate ( $\beta$ )      | 0.16   | 0.03      | 5.73    | <0.0001 |
| Exercise effect ( $\beta_j$ ) | 0.03   | 0.04      | 0.91    | 0.37    |

For the 4T07 model, the growth rate in the control group was 16%/day (Table 1B), but there was no significant effect of exercise on the growth rate (p-value = 0.37).

Table 1C: Estimated effects for C3(1)SV40Tag-p16-luc model

| Term                          | Effect | Std.Error | t-value | p-value |
|-------------------------------|--------|-----------|---------|---------|
| Baseline ( $\mu$ )            | 3.13   | 0.53      | 5.89    |         |
| Initial effect ( $\alpha_j$ ) | -1.17  | 0.66      | -1.78   | 0.08    |
| Control rate ( $\beta$ )      | 0.20   | 0.05      | 4.16    | <0.0001 |
| Exercise effect ( $\beta_j$ ) | 0.08   | 0.06      | 1.43    | 0.15    |

For the C3(1)SV40Tag-p16-luc model, the growth rate in the control group was 20%/day (Table 1C), but there was no significant effect of exercise on the growth rate (p-value = 0.15).



**Supplementary Table 2: Analysis of late effect of aerobic training on tumor growth rates**

To identify if there were late changes to the growth rate, we also fit model (1.1) to data after day 13 of each mouse tumor model.

**Table 2A: Estimated effects for late changes in EO771 model**

| Term                          | Effect | Std.Error | t-value | p-value |
|-------------------------------|--------|-----------|---------|---------|
| Baseline ( $\mu$ )            | 0.74   | 0.90      | 0.82    |         |
| Initial effect ( $\alpha_j$ ) | 1.55   | 1.17      | 1.32    | 0.19    |
| Control rate ( $\beta$ )      | 0.37   | 0.06      | 6.64    | <0.0001 |
| Exercise effect ( $\beta_j$ ) | -0.12  | 0.07      | -1.62   | 0.11    |

For the EO771 model, the late change control growth rate of 37%/day (Table 2A) was similar to the mean growth rate in the control group of 31%/day (Table 1A). There was no significant effect of exercise on the late change growth rate (p-value = 0.11).

**Table 2B: Estimated effects for late changes in 4T07 model**

| Term                          | Effect | Std.Error | t-value | p-value |
|-------------------------------|--------|-----------|---------|---------|
| Baseline ( $\mu$ )            | 5.40   | 1.61      | 3.36    |         |
| Initial effect ( $\alpha_j$ ) | -0.22  | 2.00      | -0.11   | 0.91    |
| Control rate ( $\beta$ )      | 0.03   | 0.10      | 0.35    | 0.73    |
| Exercise effect ( $\beta_j$ ) | 0.02   | 0.12      | 0.15    | 0.88    |

For the 4T07 model, the late change control growth rate of 3%/day (Table 2B) was considerably slower than the mean growth rate in the control group was 16%/day (Table 1B), but there was no significant effect of exercise on the late change growth rate (p-value = 0.88).

**Table 2C: Estimated effects for late changes in C3(1)SV40Tag-p16-luc model**

| Term                          | Effect | Std.Error | t-value | p-value |
|-------------------------------|--------|-----------|---------|---------|
| Baseline ( $\mu$ )            | 8.17   | 2.83      | 2.89    |         |
| Initial effect ( $\alpha_j$ ) | -6.13  | 3.11      | -1.97   | 0.06    |
| Control rate ( $\beta$ )      | -0.16  | 0.20      | -0.81   | 0.42    |
| Exercise effect ( $\beta_j$ ) | 0.43   | 0.21      | 2.01    | 0.05    |

For the C3(1)SV40Tag-p16-luc model, the late change control growth rate of -16%/day (Table 2C) was considerably slower than the mean growth rate in the control group was 20%/day (Table 1C), The late change growth rate in the exercise group was faster, but the difference was marginally significant (p-value = 0.05).

**Supplementary Table 3: Analysis of effect of aerobic training and digoxin on tumor volume**

|                              | <b>Effect</b> | <b>Std. Error</b> | <b>t value</b> | <b>p-value</b> |
|------------------------------|---------------|-------------------|----------------|----------------|
| <b>Baseline</b>              | 5.64          | 0.18              | 31.96          |                |
| <b>Digoxin</b>               | 0.52          | 0.37              | 1.42           | 0.17           |
| <b>Aerobic Training (AT)</b> | 0.43          | 0.26              | 1.62           | 0.11           |
| <b>Digoxin: AT</b>           | -1.24         | 0.55              | -2.24          | 0.03           |

ANOVA analysis of combined C3(1)Sv40Tag-p16-luc data sets with interaction effects.

We note that the main (monotherapy) effects of digoxin and aerobic training cause a slight increase in tumor volume relative to baseline, but these effects are not statistically significant. However the interaction effect (combination therapy) is significantly negative (p-value = 0.03), suggesting combining the therapies counteracts the small increases we would expect with the individual monotherapies. It does not, however, mean a decrease relative to baseline.
